# Supplementary material for: In-situ formation, thermal decomposition, and adsorption studies of transition metal carbonyl complexes with short-lived radioisotopes
Source: publisher site journal article supplement (doi:10.1515/ract-2013-2198), 2014-08-07
Supplement: Supplementary file 1 [file ract-2013-2198_suppl1.doc]

**Appendix: Input data for the Monte Carlo simulations**

| **Properties** |  | **Reference** |
| --- | --- | --- |
| Standard temperature | 273.15 K | [1] |
| Standard pressure | 105 Pa | [1] |
| COMPACT length | 32 cm |  |
| COMPACT width | 1 cm |  |
| COMPACT height | 0.06 cm |  |
| IC length | 191 cm |  |
| IC diameter | 0.2cm |  |
| Vibration frequency of SiO2 | 2.2∙10-13 | Calculated using the Lindemann-formula from [2] |
| Vibration frequency of Au | 2.38∙10-13 | Maximum solid state frequency from phonon spectra given in [2] |
| Molecular weight of He | 4 g/mol |  |
| Molecular weight of N2 | 28 g/mol |  |
| Molecular weight of CO | 28 g/mol |  |
| Density of He at its boiling point | 0.125 g/cm3 | [3] |
| Density of N2 at its boiling point | 0.808 g/cm3 | [3] |
| Density of CO at its boiling point | 0.793 g/cm3 | [3] |
| Half-life of 164W | 6.0 s | [4] |
| Molecular weight of 164W(CO)6 | 332 g/mol |  |
| Density of W(CO)6 | 2.65 g/mol | [3] |
| Half-life of 172Os | 19.2 s | [4] |
| Molecular weight of 172Os(CO)6 | 312 g/mol |  |
| Density of Os(CO)4 | 2.5 g/mol | Estimated |
| Half-life of 103Mo | 67.5 s | [4] |
| Half-life of 104Mo | 60.0 s | [4] |
| Half-life of 105Mo  Half-life of 106Mo  Half-life of 107Mo | 35.6 s  8.4 s  3.5 s | [4]  [4]  [4] |
| Density of Mo(CO)6 | 1.96 g/mol | [3] |
| Half-life of 170Re | 9.2 s | [4] |
| Molecular weight of 170Re(CO)x | 310 g/mol | Estimating a 170Re(CO)5 complex |
| Density of Re(CO)x | 3 g/mol | Estimated |
| Half-life of 178Ir | 12 s | [4] |
| Molecular weight of 178Ir(CO)x | 290 g/mol | Estimating a 178Ir(CO)4 complex |
| Density of Ir(CO)x | 3 g/mol | Estimated |

1. International Union of Pure and Applied Chemistry (Ed); Compendium of Chemical Terminology - Gold Book, Version **2.3.2**, 1435 (2012).

2. Eichler, B , Kratz, J.V.: Electrochemical deposition of carrier-free radionuclides. Radiochim. Acta **88**, 4752482 (2000).

3. Weast, R.C.: CRC handbook of chemistry and physics . A ready-reference book of chemical and physical data 54. ed., 1973/1974. CRC Press, Boca Cleveland (1973).

4. Chu, S.Y.F., Ekström, L.P., Firestone, R.B., The Lund/LBNL Nuclear Data Search (http://nucleardata.nuclear.lu.se/toi/index.asp), Version **2** (February 1999).
